contributors and that of their contributions. The abstracts or chapters are in many instances very superficial and, at best, lead one to "wish I was there" to hear what was actually said. Having leveled this criticism, however, I must admit that the task of producing a volume that would adequately address the wide range of situations requiring critical care is horrendous. The editors assert, in their preface, that "practical demands for early publication have precluded detailed editing for style and even content." The product of such circumstances is interesting and, in parts, serves as a refer-

ence source. However, the title is misleading, as it is not an adequate guidebook to the management of the critically ill patient, despite its 38 chapters on a wide range of topics.

H. BARRIE FAIRLEY, M.B., B.S.  
Department of Anesthesia  
University of Californiam, San Francisco  
San Francisco, California 94110

## Books Received

| Title & Edition                                                                                                                                                                                            | Author/Editor                                                                                        | Publisher                                                   |       |         |
|------------------------------------------------------------------------------------------------------------------------------------------------------------------------------------------------------------|------------------------------------------------------------------------------------------------------|-------------------------------------------------------------|-------|---------|
|                                                                                                                                                                                                            |                                                                                                      | Address, Name, Year                                         | Pages | Price   |
| <b>Advances in Pain Research and Therapy</b><br>Volume 2                                                                                                                                                   | John J. Bonica<br>Vittorio Ventafridda<br>(Editors)                                                  | New York<br>Raven Press<br>1979                             | 702   | \$48.00 |
| <i>Basic neurophysiology, neuroanatomy and psychology of nociception, role and limits of treatment, analgesics, nerve blocks, ablative procedures, augmentative stimulating procedures, terminal care.</i> |                                                                                                      |                                                             |       |         |
| <b>Neural Trauma</b><br>(Seminars in Neurological Surgery)                                                                                                                                                 | A. John Popp<br>Robert S. Bourke<br>Louis R. Nelson<br>Harold K. Kimelberg<br>(Editors)              | New York<br>Raven Press<br>1979                             | 389   | \$32.00 |
| <i>Blood flow, edema, monitoring, prognosis, treatment.</i>                                                                                                                                                |                                                                                                      |                                                             |       |         |
| <b>Computerized Tomography in Clinical Medicine</b><br>(Data Supplement)                                                                                                                                   | Patricia Davison Laffey<br>Wilbur W. Oaks<br>R. Kumar Swami<br>J. George Teplick<br>Marvin E. Haskin | Philadelphia<br>Medical Directions, Inc.<br>1978            | 57    | \$16.00 |
| <i>Incidence of visualized brain lesions and correlation with presenting symptoms and signs.</i>                                                                                                           |                                                                                                      |                                                             |       |         |
| <b>Shock Trauma Manual</b>                                                                                                                                                                                 | William Gill<br>William B. Long                                                                      | Baltimore<br>Williams and Wilkins<br>1979                   | 283   | \$18.00 |
| <i>Practical guidelines for emergency resuscitation and initial treatment of victims of major trauma.</i>                                                                                                  |                                                                                                      |                                                             |       |         |
| <b>Correlative Neuroanatomy and Functional Neurology</b><br>17th edition                                                                                                                                   | Joseph G. Chusid                                                                                     | Los Altos, California<br>Lange Medical Publications<br>1979 | 464   | \$12.00 |
| <i>Structural and functional features of the central nervous system, peripheral nerves and autonomic system relating to principles of neurodiagnosis.</i>                                                  |                                                                                                      |                                                             |       |         |
| <b>Cardiovascular Physiology for Anesthesiologists</b>                                                                                                                                                     | Ronald J. Gordon<br>Mark B. Ravin<br>George R. Daicoff                                               | Springfield, Illinois<br>Charles C Thomas                   | 209   | \$19.75 |
| <i>Introduces current advances of special relevance to acute perioperative care.</i>                                                                                                                       |                                                                                                      |                                                             |       |         |
| <b>The Heritage of Aviation Medicine</b>                                                                                                                                                                   | Robert J. Benford                                                                                    | Washington, D. C.<br>Aerospace Medical Association<br>1979  | 122   | \$4.50  |
| <i>A unique illustrated directory of historic objects related to flying health and safety.</i>                                                                                                             |                                                                                                      |                                                             |       |         |

Books Received (*Continued*)

| <b>Manic Illness</b>                                                                                                                                                                                            | Baron Shopsin<br>(Editor)                                            | New York<br>Raven Press<br>1979                                               | 234   | \$18.00          |
|-----------------------------------------------------------------------------------------------------------------------------------------------------------------------------------------------------------------|----------------------------------------------------------------------|-------------------------------------------------------------------------------|-------|------------------|
| <i>Psychoanalytic aspects, differential diagnosis, neuropharmacology, neuroendocrinology, treatment.</i>                                                                                                        |                                                                      |                                                                               |       |                  |
| <b>Advances in Shock Research</b><br>Volume 1                                                                                                                                                                   | Allan M. Lefer<br>Thomas M. Saba<br>Leena M. Mela<br>(Editors)       | New York<br>Alan R. Liss, Inc.<br>1979                                        | 285   | \$30.00          |
| <i>Twenty-two papers on hypovolemic shock, hypoxia and ischemia, and cardiogenic and splanchnic ischemic shock, by physiologists, surgeons, pathologists.</i>                                                   |                                                                      |                                                                               |       |                  |
| Title & Edition                                                                                                                                                                                                 | Author/Editor                                                        | Publisher                                                                     | Pages | Price            |
|                                                                                                                                                                                                                 |                                                                      | Address, Name, Year                                                           |       |                  |
| <b>Advances in Shock Research</b><br>Volume 2                                                                                                                                                                   | William Schumer<br>John J. Spitzer<br>Bryan E. Marshall<br>(Editors) | New York<br>Alan R. Liss, Inc.<br>1979                                        | 298   | \$30.00          |
| <i>Devoted to traumatic shock, and endotoxin and septic shock.</i>                                                                                                                                              |                                                                      |                                                                               |       |                  |
| <b>Review of Medical Physiology</b><br>Ninth edition                                                                                                                                                            | William F. Ganong                                                    | Los Altos, California<br>Lange Medical Publications<br>1979                   | 618   | \$14.00          |
| <i>A summary for medical students and others.</i>                                                                                                                                                               |                                                                      |                                                                               |       |                  |
| <b>Pain. Its Nature, Analysis and Treatment</b>                                                                                                                                                                 | Michael R. Bond                                                      | New York<br>Longman, Inc. (Churchill<br>Livingstone Medical Division)<br>1979 | 185   | \$9.95           |
| <i>An account, primarily written for medical undergraduates, of the nature of pain, its meaning and significance as a symptom of physical and mental illness, and the various types of treatment available.</i> |                                                                      |                                                                               |       |                  |
| <b>Mechanisms of Airway Obstruction in Human<br/>Respiratory Disease</b><br>(Proceedings of the International Symposium,<br>South Africa, 1978)                                                                 | M. A. de Kock<br>J. A. Nadel<br>C. M. Lewis<br>(Editors)             | Rotterdam, Netherlands<br>A. A. Balkema<br>1979                               | 413   | \$45.00<br>U. S. |
| <i>Thirty-five studies presented at the International Symposium, Tygerberg, RSA, 1978.</i>                                                                                                                      |                                                                      |                                                                               |       |                  |
